# Supplementary material
Source: PubMed Central journal article supplement (PMC5797321)
Supplement: Supp_Fig1.pdf [file Supp_Fig1.pdf]

# Supplementary Data

The screenshot displays a web portal titled "Parent Portal" with a navigation bar including "Home", "News Feed", "Members", and "Forums". The main content area is organized into sections: "My Study", "Resources for Parents and Preteens", "General Information", "Adolescents and HPV", "HPV and Sexual Health", "About", and "Contact".

Under "General Information", there are links for "HPV Questions and Answers" (CDC) and "Human Papillomavirus (HPV) and Cancer" (CDC). Under "Adolescents and HPV", there are links for "Protect Your Daughters from Cervical Cancer" (CDC), "HPV Vaccine is Recommended for Boys" (CDC), and "Age Groups and Vaccines: Adolescents" (The Children's Hospital of Philadelphia). Under "HPV and Sexual Health", there are links for "Genital HPV Infection - Fact Sheet" (CDC) and "HPV and Oropharyngeal Cancer - Fact Sheet" (CDC).

An inset window titled "HPV | Questions and Answers" is overlaid on the right side of the page. It shows a Q&A section with the following content:

**Q: How common are HPV infections?**

**A:** HPV infections are so common that nearly all men and women will get at least one type of HPV at some point in their lives. Most people never know that they have been infected and may give HPV to a sex partner without knowing it. About 79 million Americans are currently infected with some type of HPV. About 14 million people in the United States become newly infected each year.

**Q: What kinds of problems does HPV infection cause?**

**A:** Most people with HPV never develop symptoms or health problems. Most playing the game?

Below the Q&A section, there is a "Put Vaccination on Your Back-to-School List" link and a forum post by Emily Fruchterman, dated 1 year, 9 months ago. The forum post asks: "Is there anything else you expected to find on this portal, but didn't? Was there anything that could have made you feel more comfortable with your child playing the game?" and another post by Emily Fruchterman, dated 1 year, 9 months ago, which says: "Many parents find discussing HPV or sexual health with their preteens daunting – what strategies have you used to talk to your child? Do you have any questions about how to approach these topics with your preteen? Sharing your successes – and lessons from failures – can help other parents."

SUPPLEMENTARY FIG. S1. Screenshot: Parent portal resources.
